# Supplementary material
Source: Research Square preprint supplement (doi:10.21203/rs.3.rs-10399699/v1)
Supplement: Supplementary file 1 [file 9d6745382d1aae99f396e9b0.docx]

**Self-Powered UV Photodetector Based on Zr-Doped TiO2 Nanorod Arrays with Improved Photoelectrochemical Performance**

Junqin Changa, Yun Lia, Jianlong Zhanga, Mingliang Maa, Long Wanga, Na Wanga,*

aSchool of Electronic and Electrical Engineering, Ningxia University, Yinchuan 750021, China

*Corresponding authors.

Email addresses: nwang@nxu.edu.cn (N. Wang)

**1. *J-V* and *P-V* characteristics of devices**

Figure S1 presents the current density-voltage (*J-V*) and power density-voltage (*P-V*) characteristics of EUVPD devices based on TNRAs, Zr-TNRAs-1, Zr-TNRAs-2, and Zr-TNRAs-3. The photovoltaic output performance of all devices was evaluated under 365 nm UV illumination, and the corresponding power conversion behavior was extracted from the *J-V* curves. Among all samples, the Zr-TNRAs-2-based device exhibits the highest power output and short-circuit current density, consistent with the trend observed in the main tex.

**
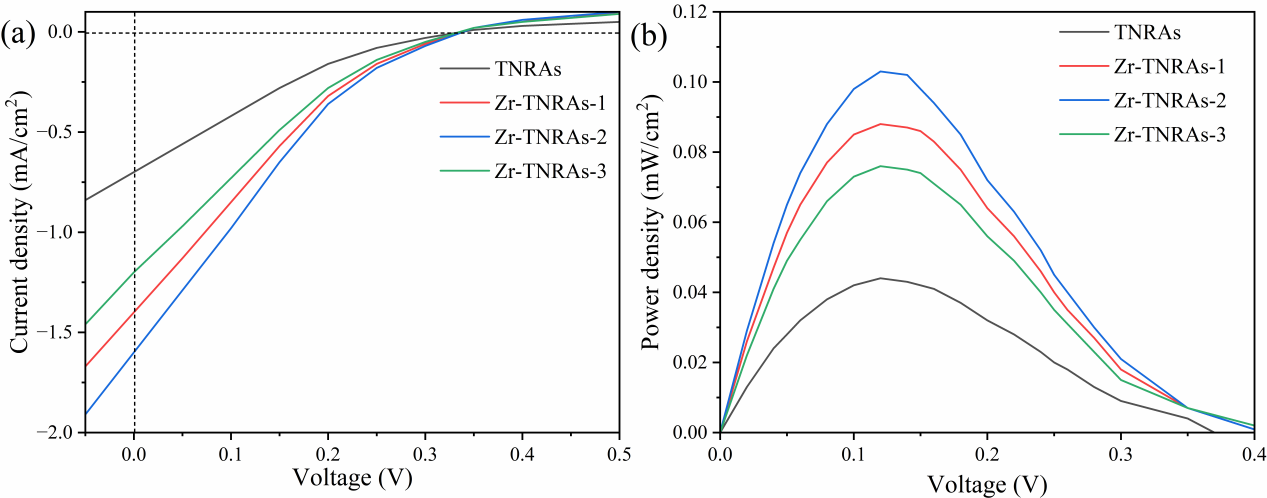
**

**Figure S1.** (a) *J-V* curves of TNRAs and Zr-TNRAs-based devices; (b) *P-V* curves of the corresponding devices.

**2. Photocurrent response under different UV irradiance**

Figure S2 shows the photocurrent density responses of devices based on (a) TNRAs, (b) Zr-TNRAs-1, (c) Zr-TNRAs-2, and (d) Zr-TNRAs-3 under different UV irradiation intensities. All devices exhibit stable and repeatable photocurrent switching behavior under varying light intensities, indicating good photoresponse stability and reproducibility.


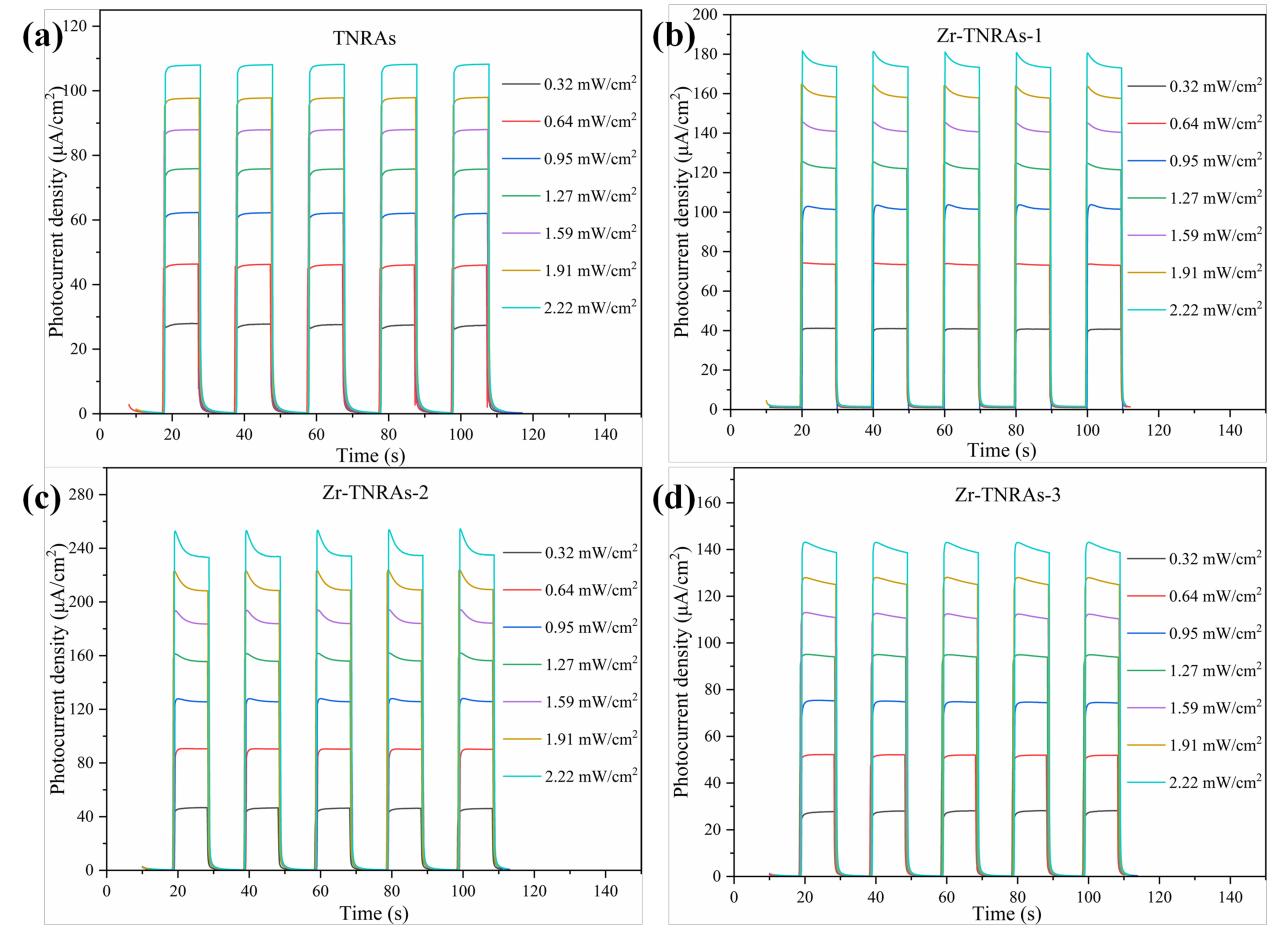


**Figure S2. Photocurrent density responses of EUVPD devices under different UV irradiation intensities.** (a) TNRAs-based device; (b) Zr-TNRAs-1-based device; (c) Zr-TNRAs-2-based device; (d) Zr-TNRAs-3-based device.

**3. Calculation of photodetector performance parameters**

The key performance parameters of the UV photodetectors are calculated as follows:

**(1) Responsivity (R)**

where is the photocurrent, and is the incident optical power, with being the irradiation intensity (W cm⁻²) and the illuminated area (cm²).

**(2) On/Off Ratio (*S*)**

where and are the photocurrent and dark current, respectively.

**(3) Response Time**

The rise time is defined as the time required for the photocurrent to increase from 10% to 90% of its maximum value (), while the decay time is defined as the time required for the photocurrent to decrease from 90% to 10% of its maximum value ().

**(4)** Specific Detectivity **(*D**)**

where is the elementary charge.

**4. Optoelectronic parameters of devices**

**Table S1.** Electrical parameters of EUVPD devices with different anode structures

| Anode structure of EUVPD devices | Current | Open-circuit  voltage | Short-circuit  Current density | Maximum power density |
| --- | --- | --- | --- | --- |
| *I*light (mA)/*I*dark (μA) | *V*oc(V) | *J*sc(mA /cm2) | *P*max (mW /cm2) |
| TNRAs | 0.67/0.20 | 0.327 | 0.71 | 0.044 |
| Zr-TNRAs-1 | 1.42/0.28 | 0.332 | 1.21 | 0.088 |
| Zr-TNRAs-2 | 1.76/0.09 | 0.330 | 1.62 | 0.103 |
| Zr-TNRAs-3 | 0.97/0.45 | 0.334 | 1.39 | 0.076 |

**5. Preparation of quasi-solid-state electrolyte (QSE)**

QSE was prepared using a polymer gelation approach. Briefly, 0.5 g of polyethylene oxide (PEO, Mw ≈ 300,000) was dissolved in 2.5 mL of a liquid iodide-based electrolyte. The liquid electrolyte was composed of lithium iodide (0.1673 g), iodine (0.1586 g), 4-tert-butylpyridine (0.1690 g), and 1,2-dimethyl-3-propylimidazolium iodide (0.3988 g) dissolved in deionized water. The mixture was magnetically stirred at room temperature for 24 h to ensure complete dissolution of PEO and formation of a homogeneous gel network. Subsequently, 0.05 g polyethylene glycol (PEG, Mw ≈ 10,000) was added and stirred for an additional 30 min to reduce crystallinity and enhance ionic transport properties.
